# Supplementary material
Source: Springer Nature journal article supplement (https://www.springermedizin.de/resource/supplementary/12933_2014_832_MOESM2_ESM.pdf/9539342)

A

Serum omentin-1 levels (ng/ml)

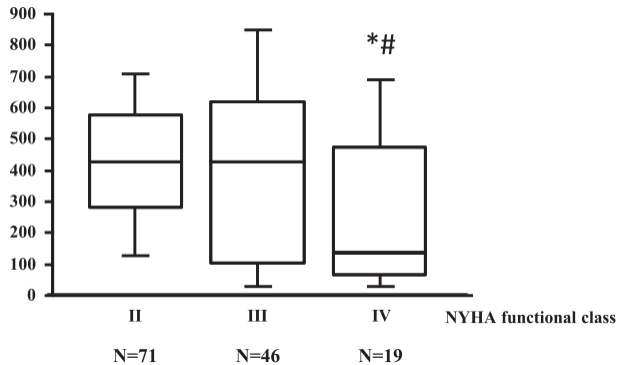

B

Serum BNP levels (pg/ml)

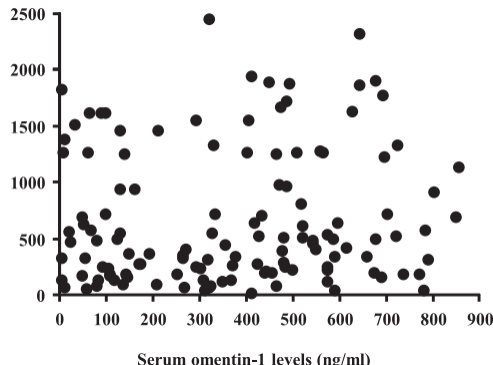

Supplement: MOESM2 [file 9539342]
